# Supplementary material for: Genomic landscape of colorectal cancer in Japan: clinical implications of comprehensive genomic sequencing for precision medicine
Source: PubMed Central journal article supplement (PMC5180401; doi:10.1186/s13073-016-0387-8), 2016-12-22
Supplement: 13073_2016_387_MOESM1_ESM.pdf [file 13073_2016_387_MOESM1_ESM.pdf]

graphs. As shown, KRAS G12 were the highest frequency mutations. Patient samples were further plotted by mutation status (**F**) KRAS-hypermuted, (**G**) KRAS-non-hypermuted.

**Figure S2**

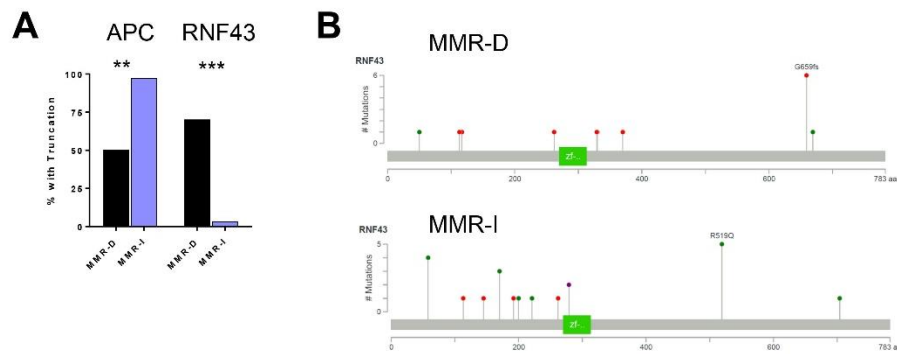

**Figure S2. Correlation of RNF43 mutations with MMR.** (A) The frequencies of APC and RNF43 mutations were determined by MMR phenotype. Statistical significance was determined by Fisher's exact test. (B) Mutation mapper analysis identified G659 as most frequently altered in MMR-D cases.

**Figure S3**

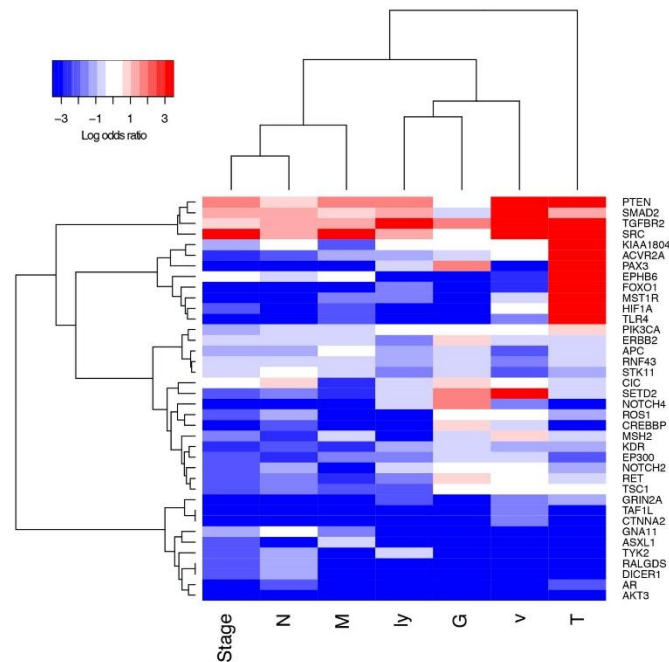

**Figure S3. Gene-based statistical analysis for clinical information.** Genes were filtered based on Fisher exact test ( $P < 0.05$ ). Cell values are log odds ratios colored from blue to red. Dendrograms were created by Euclidean distance and Ward's method. Less (blue) or more (red) aggressive factors of seven clinical variables are shown: lymphatic invasion (ly), vascular invasion (v), histopathological grade (G), TNM classifications (T, N, and M), and tumor stage.

**Figure S4**

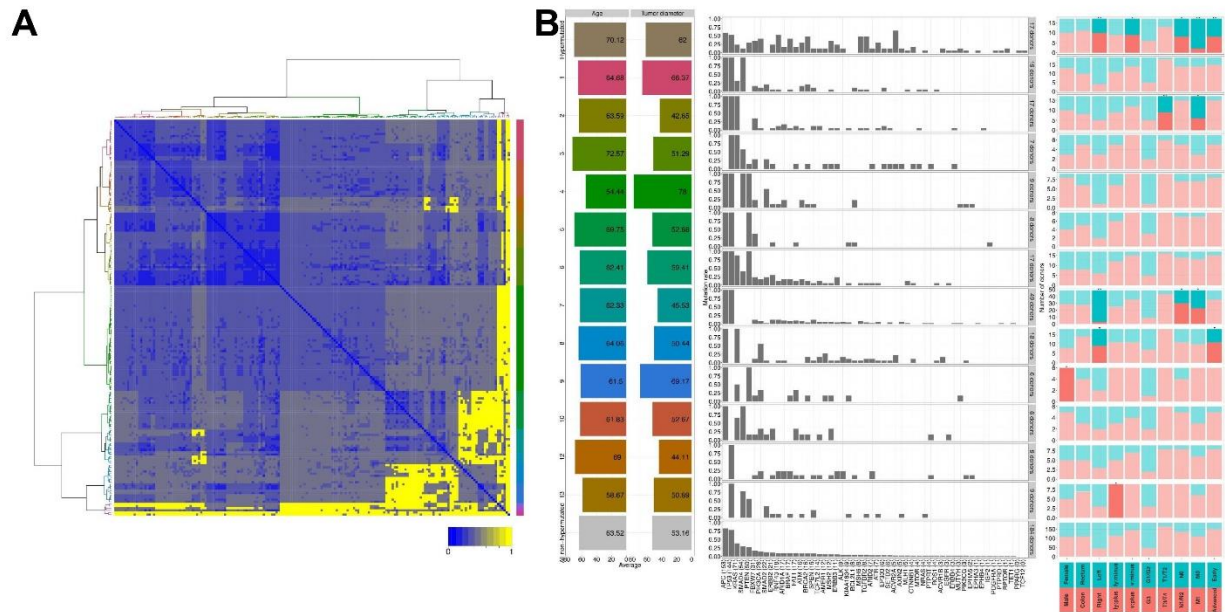

**Figure S4. Cluster of 61-gene co-mutation patterns.** (A) Cluster analysis was performed on non-hypermuted Japanese CRC samples ( $n = 184$  tumors) by using Euclidean distance and Ward's clustering method (closest distance to common mutated-genes are colored yellow to blue). (B) Co-mutated gene patterns of 61-gene set with statistical analysis. Mutation rate in each group is shown as a bar graph in the middle panel. Group-based mean values for age and tumor diameter are shown (left) with cluster colors and fraction for clinical information (right). Dark bars indicate significant difference ( $P < 0.05$ , two-tailed Fisher's exact test) to the distribution of all other non-hypermuted donors, light bars are non-significant (\*\* $P < 0.01$ , \* $P < 0.05$ ).

**Figure S5**

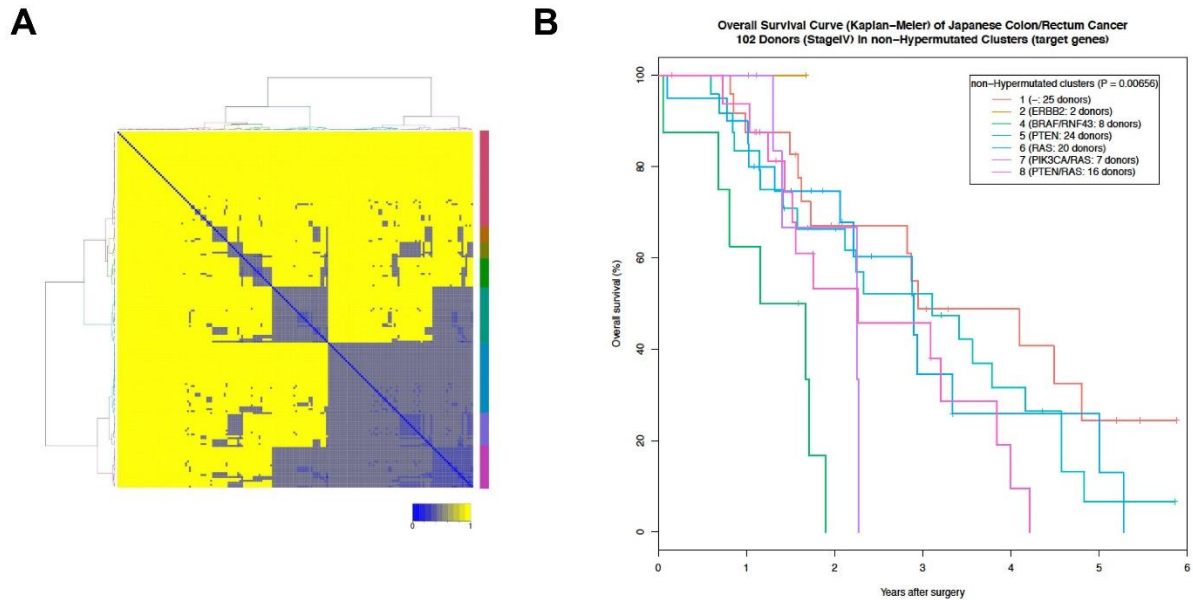

**Figure S5. Data Complementary to Figure 3.** (A) Cluster analysis was performed on non-hypermethylated Japanese CRC samples (n = 184 tumors) by using Euclidean distance and Ward's clustering method (closest distance to common mutated-genes are colored yellow to blue). (B) Kaplan-Meier survival estimates according to genomic subgroups. Overall survival was analyzed in 102 patients with Stage IV CRC treated with anti-EGFR therapies. The patients were divided to "All WT (wild type)" (cluster 1; n = 25) or "Mutated" (cluster 2-8; n = 77) based on the cluster analysis with targeted therapy-related 26 genes.

**Table S1**

| Table S1. 415 gene list for the comprehensive genomic sequencing platform |                     |                |                |                 |                    |                |               |
|---------------------------------------------------------------------------|---------------------|----------------|----------------|-----------------|--------------------|----------------|---------------|
| GENE LIST                                                                 |                     |                |                |                 |                    |                |               |
| ABL1                                                                      | CASP8               | EP300 (P300)   | FOXL2          | KAT6B (MYST4)   | MYCL1              | PIM1           | SOX11         |
| ABL2 (ARG)                                                                | CBF3                | EPHA3          | FOXO1          | KDM5A (JARID1A) | MYCN               | PKHD1          | SOX2          |
| ACVR1B                                                                    | CBL                 | EPHA5          | FOXP1          | KDM5C           | MYD88              | PLAG1          | SOX9          |
| ACVR2A                                                                    | CCND1 (Cyclin D1)   | EPHA7          | G6PD           | KDM6A           | MYH11              | PLCG1          | SPEN          |
| AFF1                                                                      | CCND2 (Cyclin D2)   | EPHB1          | GATA1          | KDR (VEGFR2)    | MYH9               | PML            | SPOP          |
| AKT1                                                                      | CCND3 (Cyclin D3)   | EPHB4          | GATA2          | KEAP1           | NBN                | PMS1           | SRC           |
| AKT2                                                                      | CCNE1 (Cyclin E1)   | EPHB6          | GATA3          | KIAA1804 (MLK4) | NCOA1              | POT1           | STAG2         |
| AKT3                                                                      | CD70 (TNFSF7)       | ERBB2 (HER2)   | GDNF           | KIT             | NCOA2              | PPARG          | STAT3         |
| ALK                                                                       | CD79A               | ERBB3 (HER3)   | GID4           | KLF5            | NCOA4              | PPP2R1A        | STAT4         |
| AMER1 (FAM123B)                                                           | CD79B               | ERBB4 (HER4)   | GNA11          | KLF6            | NF1                | PPP6C          | STK11(LKB1)   |
| APC                                                                       | CDC73 (HRPT1)       | ERCC1 (RAD10)  | GNA13          | KLHL6           | NF2 (Merlin)       | PRDM1 (BLIMP1) | STK36(FU)     |
| AR                                                                        | CDH1 (E-Cadherin)   | ERCC2 (XPD)    | GNAQ           | MLL (KMT2A)     | NFE2L2 (NRF2)      | PRKAR1A        | SUFU          |
| ARAF                                                                      | CDH11 (Cadherin 11) | ERCC3 (XPB)    | GNAS           | MLL2 (KMT2D)    | NFKB1 (NFKB-p105)  | PRKDC          | SYK           |
| ARFRP1 (ARP1)                                                             | CDH2 (N-Cadherin)   | ERCC4 (XPF)    | GPC6           | KRAS            | NFKB1A             | PSIP1          | TAF1          |
| ARID1A                                                                    | CDH5 (VE-Cadherin)  | ERCC5          | GPR124         | LAMP1           | NFKB2 (NFKB)       | PTCH1          | TAF1L         |
| ARID2                                                                     | CDK12               | ERG            | GRIK3          | LCK             | NIN                | PTEN           | TAL1(SCL)     |
| ARNT (HIF-1β)                                                             | CDK4                | ESR1           | GRIN2A         | LPP             | NKX2-1 (TTF1)      | PTGS2 (COX2)   | TBX22         |
| ASCL4                                                                     | CDK6                | ETV1           | GSK3B          | LRP1B           | NLRP1              | PTPRD          | TCF12         |
| ASXL1                                                                     | CDK8                | ETV1           | HCAR1          | LTF             | Notch1             | PTPRT          | TCF3          |
| ATM                                                                       | CDKN1A              | ETV4           | HCM1           | MAGEA1          | NOTCH2             | RAC1           | TCF7L1        |
| ATR                                                                       | CDKN1B (p27)        | EXT1           | HGF            | MAG1            | NOTCH4             | RAF1 (CRAF)    | TCF7L2        |
| ATRX                                                                      | CDKN2A (INK4)       | EXT2           | HIF1A          | MALT1           | NPM1               | RALGDS         | TCL1A         |
| AURKA                                                                     | CDKN2B (INK4B)      | EZH2           | HLF            | MAML2           | NRAS               | RARA           | TET1          |
| AURKB                                                                     | CDKN2C (INK4C)      | FAM46C         | HNF1A          | MAP2K1 (MEK1)   | NTRK1              | RASA1          | TET2          |
| AURKC                                                                     | CEBPA               | FANCA          | HNF4A          | MAP2K2 (MEK2)   | NTRK2              | RB1            | TET3          |
| AXIN2                                                                     | CHEK1               | FANCC          | HRAS           | MAP2K4 (MEK4)   | NTRK3              | REL            | TGFBR2        |
| AXL (UFO)                                                                 | CIC                 | FANCE          | HSP90AA1       | MAP3K1 (MEKK1)  | NUMA1              | RET            | TGM7          |
| BAP1                                                                      | CREBBP              | FANCF          | HSP90AB1       | MAP3K7 (TGF1A)  | NUP214             | RHOH           | TLR4          |
| BARD1                                                                     | CRKL                | FANCG          | ICK            | MAPK1 (ERK2)    | NUP93              | RICTOR         | TNFAIP3(A20)  |
| BCL10                                                                     | CRLF2               | FANCL          | IDH1           | MAPK8 (JNK1)    | NUP98              | RNASEL         | TNFRSF14      |
| BCL11A (ZNF856)                                                           | CRTC1               | FAS (APO-1)    | IDH2           | MBD1            | PAK3               | RNF2           | TNK2(ACL1)    |
| BCL11B                                                                    | CSF1R               | FAT1           | IGF1R          | MCL1            | PALB2              | RNF43          | TOP1          |
| BCL2                                                                      | CSMD3               | FBXW7 (BAF250) | IGF2           | MDM2            | PARP1              | ROS1           | TP53(P53)     |
| BCL2L1 (BCL-X)                                                            | CTCF                | FGF10          | IGF2R          | MDM4            | PAX3               | RPS6KA2        | TP63          |
| BCL2L2 (BCL-W)                                                            | CTNNA1 (α1-Catenin) | FGF14          | IKBKB (IKKKB)  | MED12           | PAX5               | RPTOR (RAPTOR) | TPR           |
| BCL6                                                                      | CTNNA2 (α2-Catenin) | FGF19          | IKBKE          | MEF2B           | PAX7               | RRM1           | TRIM33(TIF1y) |
| BCL9                                                                      | CTNNB1 (β-Catenin)  | FGF23          | IKZF1 (IKAROS) | MEN1            | PAX8               | RUNX1 (AML1)   | TRIP11        |
| BCOR                                                                      | CUX1                | FGF3           | IL2            | MET             | PBRM1              | RUNX1T1 (ETO)  | TRRAP         |
| BCORL1                                                                    | CYLD                | FGF4           | IL21R          | MITF            | PBX1               | SAMD9          | TSC1          |
| BIRC2 (IAP2)                                                              | DAXX                | FGF6           | IL6ST (CD130)  | MLH1            | PDGFRA             | SDHB           | TSC2          |
| BIRC3 (AIP1)                                                              | DCC                 | FGFR1          | IL7R           | MPM2            | PDGFRB             | SETD2          | TSHR          |
| BLM                                                                       | DDB2                | FGFR2          | INHBA          | MN1             | PDK1               | SF3B1          | TYK2          |
| BLNK                                                                      | DDIT3 (GADD153)     | FGFR3          | IRF4           | MPL             | PGAP3              | SGK1           | UBR5          |
| BMPR1A                                                                    | DDR1                | FGFR4          | IRS2           | MRE11A          | PHOX2B             | SH2D1A         | USP9X         |
| BRAF                                                                      | DDR2                | FH             | ITGA10         | MSH2            | PIK3C2B (PI3K-C2β) | SLIT2          | VHL           |
| BRCA1                                                                     | DICER1              | FLCN           | ITGB2          | MSH6            | PIK3CA (p110α)     | SMAD2          | WISP3         |
| BRCA2                                                                     | DNMT3A              | FLI1           | ITGB3          | MST1R (RON)     | PIK3CB (PIK3C1)    | SMAD4          | WT1           |
| BRIP1 (FANCI)                                                             | DOT1L               | FLT1 (VEGFR1)  | JAK1           | MTOR            | PIK3CD (p110δ)     | SMARCA4        | XPC           |
| BTK                                                                       | DST                 | FLT3 (STK1)    | JAK2           | MTR             | PIK3CG (p110γ)     | SMARCB1        | XPO1(CRM1)    |
| BUB1B                                                                     | EDNRB               | FLT4 (VEGFR3)  | JAK3           | MTRR            | PIK3R1 (GRB1)      | SMO            | ZNF384        |
| C11orf30 (EMSY)                                                           | EGFR                | FN1            | JUN            | MUTYH           | PIK3R2 (p85)       | SOCS1          | ZNF521(EV13)  |
| CARD11                                                                    | EML4                | FOXA1 (HNF3A)  | KAT6A (MOZ)    | MYC             | PIK3R3 (p55γ)      | SOX10          |               |

**Table S2****Table S2.** BRAF mutation and tumor location (J-CRC, n = 201)

|          |         | BRAF mutation |         |           | <i>P</i> value |
|----------|---------|---------------|---------|-----------|----------------|
|          |         | Absent        | Present |           |                |
|          |         |               | V600E   | Non-V600E |                |
| Location | Rt : Lt | 40 : 137      | 12 : 1  | 3 : 8     | < 0.001        |



Table S3

Table S3. Raw data for gene-based statistical analysis for clinical information

| Gene/Category | logOR        | ly_P        | v_logOR      | v_P         | G_logOR      | G_P       | T_logOR      | T_P          | N_logOR      | N_P          | M_logOR      | M_P          | Stage_logOR  | Stage_P      |           |
|---------------|--------------|-------------|--------------|-------------|--------------|-----------|--------------|--------------|--------------|--------------|--------------|--------------|--------------|--------------|-----------|
| ACVR2A        | -1.284609972 | 0.3755518   | 0.155294596  | 1           | -0.507606552 | 1         | 4            | 1            | -2.102652993 | 0.1184945    | -1.183467306 | 0.392881     | -2.8172955   | 0.0445392    |           |
| AKT3          | -4           | 0.1476004   | -4           | 0.04632929  | -4           | -4        | 1            | -3.067989641 | 0.206106     | -4           | 0.06985032   | -4           | 0.16043      | 0.0333215    |           |
| APC           | -1.295281341 | 0.06725693  | -2.251591667 | 0.02947482  | -0.524142289 | 0.3794865 | -0.94670123  | 0.5352907    | -1.064633493 | 0.183836     | -0.108808085 | 1            | -1.24029055  | 0.2098898    |           |
| AR            | -4           | 0.05595839  | -4           | 0.009673149 | -4           | 0.5685854 | -2.073359256 | 0.2933471    | -2.494977387 | 0.1734744    | -4           | 0.06346683   | -3.192881205 | 0.0882469    |           |
| ASXL1         | -4           | 0.1476004   | -4           | 0.04632929  | -4           | -4        | 1            | -3.067989641 | 0.206106     | -4           | 0.06985032   | -0.575097255 | 1            | -2.158068734 | 0.3362438 |
| CIC           | -0.689931225 | 0.6776591   | 0.485955375  | 1           | 0.517781619  | 0.6519424 | -0.738161603 | 0.5036991    | 0.880398721  | 1            | -2.967014481 | 0.03942998   | 0.185437795  | 1            |           |
| CREBBP        | -4           | 0.05595839  | -0.858887698 | 0.5228592   | 0.508501673  | 1         | -4.13054535  | 0.03162376   | -2.494977387 | 0.1734744    | -4           | 0.06346683   | -3.192881205 | 0.0882469    |           |
| CTNNA2        | -4           | 0.1476004   | -1.861391009 | 0.3884533   | -4           | -4        | 1            | -3.067989641 | 0.206106     | -4           | 0.06985032   | -4           | 0.16043      | 0.0333215    |           |
| DICER1        | -4           | 0.1476004   | -4           | 0.04632929  | -4           | -4        | 1            | -3.067989641 | 0.206106     | -1.471616719 | 0.4627584    | -4           | 0.16043      | -2.158068734 | 0.3362438 |
| EP300         | -1.718624356 | 0.2072926   | -0.875775107 | 0.6123848   | -0.839164466 | 1         | -2.132899965 | 0.1291324    | -2.546382759 | 0.04407598   | -1.616069672 | 0.2215466    | -2.228140107 | 0.0777698    |           |
| EPHB6         | -4           | 0.007825243 | -2.506705186 | 0.06944369  | -4           | 0.3286899 | 4            | 1            | -0.899239748 | 0.6102924    | 0.013347912  | 1            | -0.144645866 | 1            |           |
| ERBB2         | -1.547734362 | 0.03030159  | -0.598267096 | 0.4085125   | 0.569845889  | 0.4343159 | -0.514269208 | 0.7068149    | -0.523499272 | 0.4429833    | -0.799511968 | 0.2449152    | -0.941590953 | 0.2322211    |           |
| FOXO1         | -1.689344383 | 0.5601184   | -2.890523361 | 0.1196416   | -4           | 0.5685854 | 4            | 1            | -4           | 1            | -4           | 0.01803827   | -4           | 0.0058567    |           |
| GNA11         | -4           | 0.05595839  | -4           | 0.009673149 | -4           | 0.5685854 | -4.13054535  | 0.03162376   | -0.46758329  | 1            | -1.589458734 | 0.565658     | -1.157180105 | 0.4602422    |           |
| GRIN2A        | -2.29240312  | 0.3000779   | -1.888440865 | 0.2065227   | -4           | 0.5741469 | -1.486263082 | 0.3714303    | -4           | -4           | 0.004584312  | -4           | 0.02489583   | -4           | 0.0010034 |
| HIF1A         | -4           | 0.02102304  | -0.267667232 | 1           | -4           | 0.5741469 | 4            | 1            | -3.106993866 | 0.05840014   | -2.19169173  | 0.3040929    | -2.192437345 | 0.1560693    |           |
| KDR           | -1.284609972 | 0.3755518   | -1.297958493 | 0.2979088   | -0.507606552 | 1         | -1.066379323 | 0.4412713    | -2.102652993 | 0.1184945    | -2.625350198 | 0.1593122    | -2.8172955   | 0.0445392    |           |
| KIAA1804      | -0.36480729  | 0.7355785   | -0.042518163 | 1           | -0.318018823 | 1         | 4            | 0.6003606    | -0.484832559 | 0.7019028    | -2.482898902 | 0.03149532   | -1.207531084 | 0.3705754    |           |
| MSH2          | -3.168830988 | 0.001479283 | 0.501234287  | 1           | -0.864102434 | 0.7343846 | -0.789894646 | 0.623339     | -2.657669185 | 0.003152127  | -0.6095117   | 0.5484971    | -1.80321219  | 0.0480152    |           |
| MST1R         | -1.689344383 | 0.5601184   | -0.858887698 | 0.5228592   | -4           | 0.5685854 | 4            | 1            | -4           | 0.01803827   | -1.589458734 | 0.565658     | -3.192881205 | 0.0882469    |           |
| NOTCH2        | -0.681973376 | 0.6403178   | -0.267667232 | 1           | -0.083811082 | 1         | -1.486263082 | 0.3714303    | -1.4910469   | 0.2885487    | -4           | 0.02489583   | -2.192437345 | 0.1560693    |           |
| NOTCH4        | -0.674200064 | 1           | -1.861391009 | 0.3884533   | 1.512363437  | 0.4547398 | -3.067989641 | 0.206106     | 4            | 1            | -4           | 0.06985032   | -4           | 0.16043      | 0.0333215 |
| PAX3          | -0.674200064 | 1           | -4           | 0.04632929  | 1.512363437  | 0.4547398 | 4            | 1            | -4           | 0.06985032   | -4           | 0.16043      | -4           | 0.0333215    |           |
| PIK3CA        | 0.00884827   | 1           | -0.478026836 | 0.4543292   | 0.388588531  | 0.6304497 | 0.622586499  | 0.7438598    | -0.925794643 | 0.1548468    | -0.665383445 | 0.287826     | -1.483883162 | 0.030135     |           |
| PTEN          | 1.515538374  | 0.006140614 | 3.235593352  | 0.000202584 | -0.216974899 | 0.8505134 | 3.007111621  | 0.01621924   | 0.71186049   | 0.2623133    | 1.861017605  | 0.000662422  | 1.722303384  | 0.0315458    |           |
| RALGDS        | -4           | 0.1476004   | -4           | 0.04632929  | -4           | -4        | 1            | -3.067989641 | 0.206106     | -1.471616719 | 0.4627584    | -4           | 0.16043      | -2.158068734 | 0.3362438 |
| RET           | -1.718624356 | 0.2072926   | 0.485955375  | 1           | 0.517781619  | 0.6519424 | -0.738161603 | 0.5036991    | -1.51104536  | 0.192913     | -2.967014481 | 0.03942998   | -2.228140107 | 0.0777698    |           |
| RNF43         | -1.099150113 | 0.1327786   | -1.732161732 | 0.02971689  | -0.890653884 | 0.4107714 | -0.804541778 | 0.4210965    | -0.513259682 | 0.5751986    | -0.988777182 | 0.2068802    | -0.85607407  | 0.334904     |           |
| ROS1          | -4           | 0.02102304  | -0.267667232 | 1           | -0.083811082 | 1         | -1.486263082 | 0.3714303    | -1.4910469   | 0.2885487    | -4           | 0.02489583   | -2.192437345 | 0.1560693    |           |
| SETD2         | -0.689931225 | 0.6776591   | 4            | 0.3424384   | 1.553256291  | 0.1838005 | -0.738161603 | 0.5036991    | -1.51104536  | 0.192913     | -2.967014481 | 0.03942998   | -2.228140107 | 0.0777698    |           |
| SMAD2         | 1.218889637  | 0.1600386   | 4            | 0.00475656  | -0.743048298 | 0.4471453 | 1.474560124  | 0.4756843    | 1.322558703  | 0.1993075    | 0.592643125  | 0.4897596    | 1.293901317  | 0.3782521    |           |
| SRC           | 1.283285898  | 0.2541192   | 4            | 0.04243197  | 0.194803177  | 0.7609899 | 4            | 0.3702242    | 1.191646026  | 0.3597853    | 4            | 0.000929095  | 4            | 0.0762531    |           |
| STK11         | -1.752870168 | 0.0142476   | -2.143697248 | 0.002892355 | -0.549758652 | 0.6003726 | -1.201057302 | 0.2421052    | -0.268643472 | 0.7895144    | -0.640211006 | 0.3472434    | -0.630047367 | 0.54         |           |
| TAF1L         | -4           | 0.1476004   | -1.861391009 | 0.3884533   | -4           | -4        | 1            | -3.067989641 | 0.206106     | -4           | 0.06985032   | -4           | 0.16043      | -4           | 0.0333215 |
| TGFBR2        | 4            | 0.02408589  | 4            | 0.2039284   | 1.574646504  | 0.2088114 | 4            | 0.6017747    | 1.386330888  | 0.6836729    | 1.049229963  | 0.4780347    | 0.688603815  | 1            |           |
| TLR4          | -4           | 0.02102304  | -1.888440865 | 0.2065227   | -4           | 0.5741469 | 4            | 1            | -3.106993866 | 0.05840014   | -2.19169173  | 0.3040929    | -3.818710048 | 0.0204246    |           |
| TSC1          | -2.344100875 | 0.05653853  | -0.274080715 | 0.685341    | -0.085694037 | 1         | -0.237944303 | 1            | -1.531562654 | 0.2120499    | -2.240266692 | 0.06206673   | -2.265268966 | 0.0397059    |           |
| TYK2          | -0.674200064 | 1           | -4           | 0.04632929  | -4           | -4        | 1            | -3.067989641 | 0.206106     | -1.471616719 | 0.4627584    | -4           | 0.16043      | -2.158068734 | 0.3362438 |

P-value < 0.05

**Table S4****Table S4. Clinicopathological characteristics of colorectal cancer 201 patients**

| Variable                                             |                                          |
|------------------------------------------------------|------------------------------------------|
| Age (years) <sup>a</sup>                             | 65 (30–94)                               |
| Sex                                                  |                                          |
| Male : Female                                        | 84 : 117                                 |
| Tumor size (mm) <sup>a</sup>                         | 50 (7–155)                               |
| Location                                             |                                          |
| Colon : Rectum                                       | 120 : 81                                 |
| T category                                           |                                          |
| T1 : T2 : T3 : T4a : T4b                             | 6 : 18 : 97 : 64 : 16                    |
| Histopathological grading                            |                                          |
| G1 : G2 : G3                                         | 0.553402778                              |
| Lymphatic invasion                                   |                                          |
| Absence : Presence                                   | 79 : 122                                 |
| Venous invasion                                      |                                          |
| Absence : Presence                                   | 48 : 153                                 |
| N category                                           |                                          |
| N0 : N1a : N1b : 2a : 2b                             | 58 : 34 : 29 : 41 : 39                   |
| M category                                           |                                          |
| M0 : M1a : M1b                                       | 88 : 63 : 50                             |
| Stage                                                |                                          |
| I : IIA : IIB : IIC : IIIA : IIIB : IIIC : IVA : IVB | 11 : 26 : 5 : 1 : 11 : 23 : 11 : 63 : 50 |

<sup>a</sup> Data are expressed as median (range)
